# Supplementary material for: Chemical characterization of urban aerosols in Abidjan and Korhogo (Côte d'Ivoire) from 2018 to 2020 and the identification of their potential emission sources
Source: Royal Society of Chemistry journal article supplement (doi:10.1039/d3ea00131h), 2023-01-01

## SUPPLEMENTARY MATERIALS

### Chemical characterization of urban aerosols in Abidjan and Korhogo (Cote d'Ivoire) from 2018 to 2020 and identification of their potential emission sources

Sylvain Gnamien<sup>\*a</sup>, Cathy Liousse<sup>b</sup>, Sékou Keita<sup>c</sup>, Silue Siélé<sup>c</sup>, Bahino Julien<sup>a</sup>, Eric Gardrat<sup>b</sup>, Kassamba-Diaby Mohamed<sup>a</sup>, Arsène Ochou<sup>a</sup> and Véronique Yoboué<sup>a</sup>

Table S1. Analytical parameters for ion chromatography

| Devices (Operating software)                                             | Species analysed                                                                                                                                                                                                 | Columns (4 mm) (Analysis time)                    | Suppression                           | Eluent composition (Flow rate)                                                                                       |
|--------------------------------------------------------------------------|------------------------------------------------------------------------------------------------------------------------------------------------------------------------------------------------------------------|---------------------------------------------------|---------------------------------------|----------------------------------------------------------------------------------------------------------------------|
| DIONEX ICS 1000<br>+Passeur d'échantillons<br>AS 40<br>(Chromeleon 6.8)  | Anions :<br>F <sup>-</sup> , Cl <sup>-</sup> , NO <sub>2</sub> <sup>-</sup> , NO <sub>3</sub> <sup>-</sup> , SO <sub>4</sub> <sup>2-</sup> , PO <sub>4</sub> <sup>3-</sup>                                       | Echange Ionique<br>AG4A-SC<br>+ AS4A-SC<br>(9 mn) | Autosuppression<br>DIONEX AERS<br>500 | Mode Isocratique<br>(1.8 mM Na <sub>2</sub> CO <sub>3</sub> /1.7 mM NaHCO <sub>3</sub> )<br>(2 mL/mn)                |
| DIONEX ICS 1100<br>+Passeur d'échantillons<br>AS 50<br>(Chromeleon 6.8)  | Cations :<br>Na <sup>+</sup> , NH <sub>4</sub> <sup>+</sup> , K <sup>+</sup> , Mg <sup>2+</sup> , Ca <sup>2+</sup>                                                                                               | Echange Ionique<br>CG12A +<br>CS12A<br>(14 mn)    | Autosuppression<br>DIONEX CERS<br>500 | Mode Isocratique<br>20 mM CH <sub>3</sub> SO <sub>3</sub> H (MSA)<br>(1 mL/mn)                                       |
| DIONEX ICS 5000+<br>+Passeur d'échantillons<br>AS AP<br>(Chromeleon 7.2) | Acides et anions :<br>Acétique, Propionique, Formique et Oxalique, Cl <sup>-</sup> , NO <sub>3</sub> <sup>-</sup> , NO <sub>2</sub> <sup>-</sup> , SO <sub>4</sub> <sup>2-</sup> , PO <sub>4</sub> <sup>3-</sup> | Echange Ionique<br>AG11 +<br>AS11<br>(19 mn)      | Autosuppression<br>DIONEX AERS<br>500 | Mode Gradient<br>90% H <sub>2</sub> O-10% NaOH 5mM (15 mn)<br>89% H <sub>2</sub> O-11% NaOH 100mM (4mn)<br>(1 mL/mn) |
| DIONEX ICS 5000+<br>+Passeur d'échantillons<br>AS AP<br>(Chromeleon 7.2) | Carbonates                                                                                                                                                                                                       | Exclusion Ionique<br>ICE-AS1<br>(15 mn)           | Sans                                  | Mode Isocratique<br>100 % H <sub>2</sub> O<br>(1 mL/mn)                                                              |

**Calibration** : Dilution of single-element standards (1000 ppm) in ultrapure water type 1 (Three-point calibration curves forced to zero with R<sup>2</sup> > 0.99)

Fig. S1 Contributions of chemical species to identified sources with the PMF in Abidjan (site A1, UFHB). To take account of unidentified fractions, the PM<sub>2.5</sub> concentrations were added to the species.

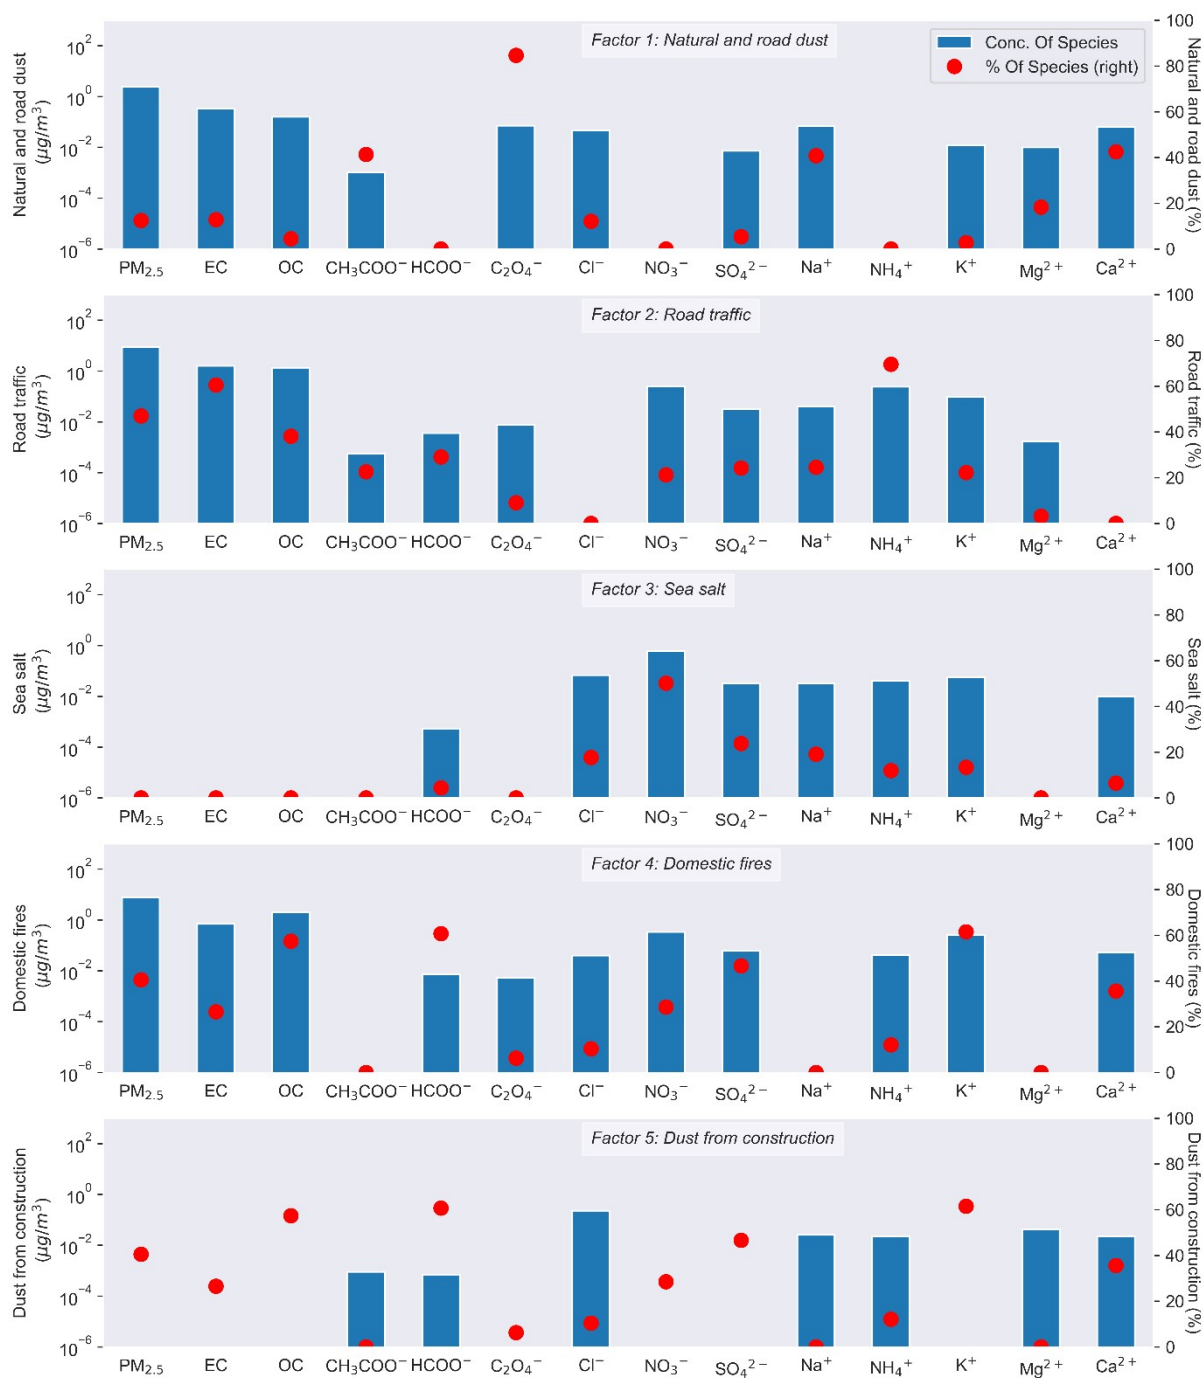

Fig. S2 Contributions of chemical species to identified sources with the PMF in Korhogo (K1 site, UPGC). To take account of unidentified fractions, the PM2.5 concentrations were added to the species.

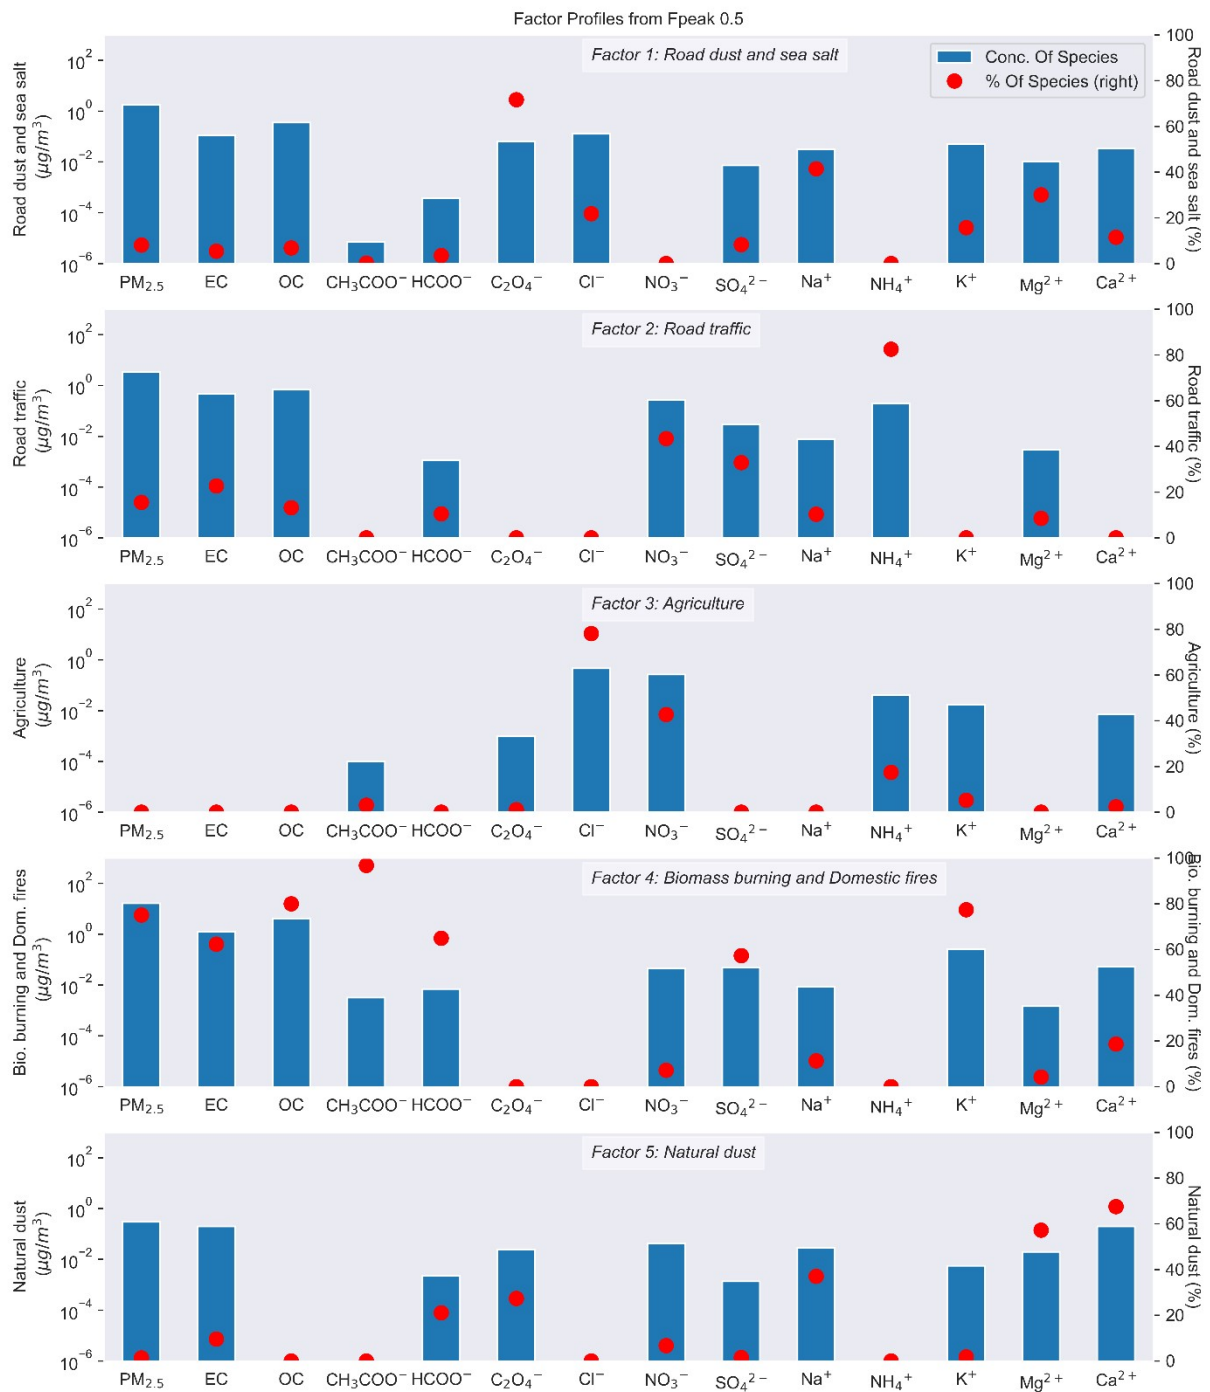

Fig. S3 Contribution profiles of identified sources to PM2.5 aerosol concentrations in Abidjan (site A1, UFHB). The gray-shaded areas represent the dry seasons (DS), from left to right, DS1 and DS2.

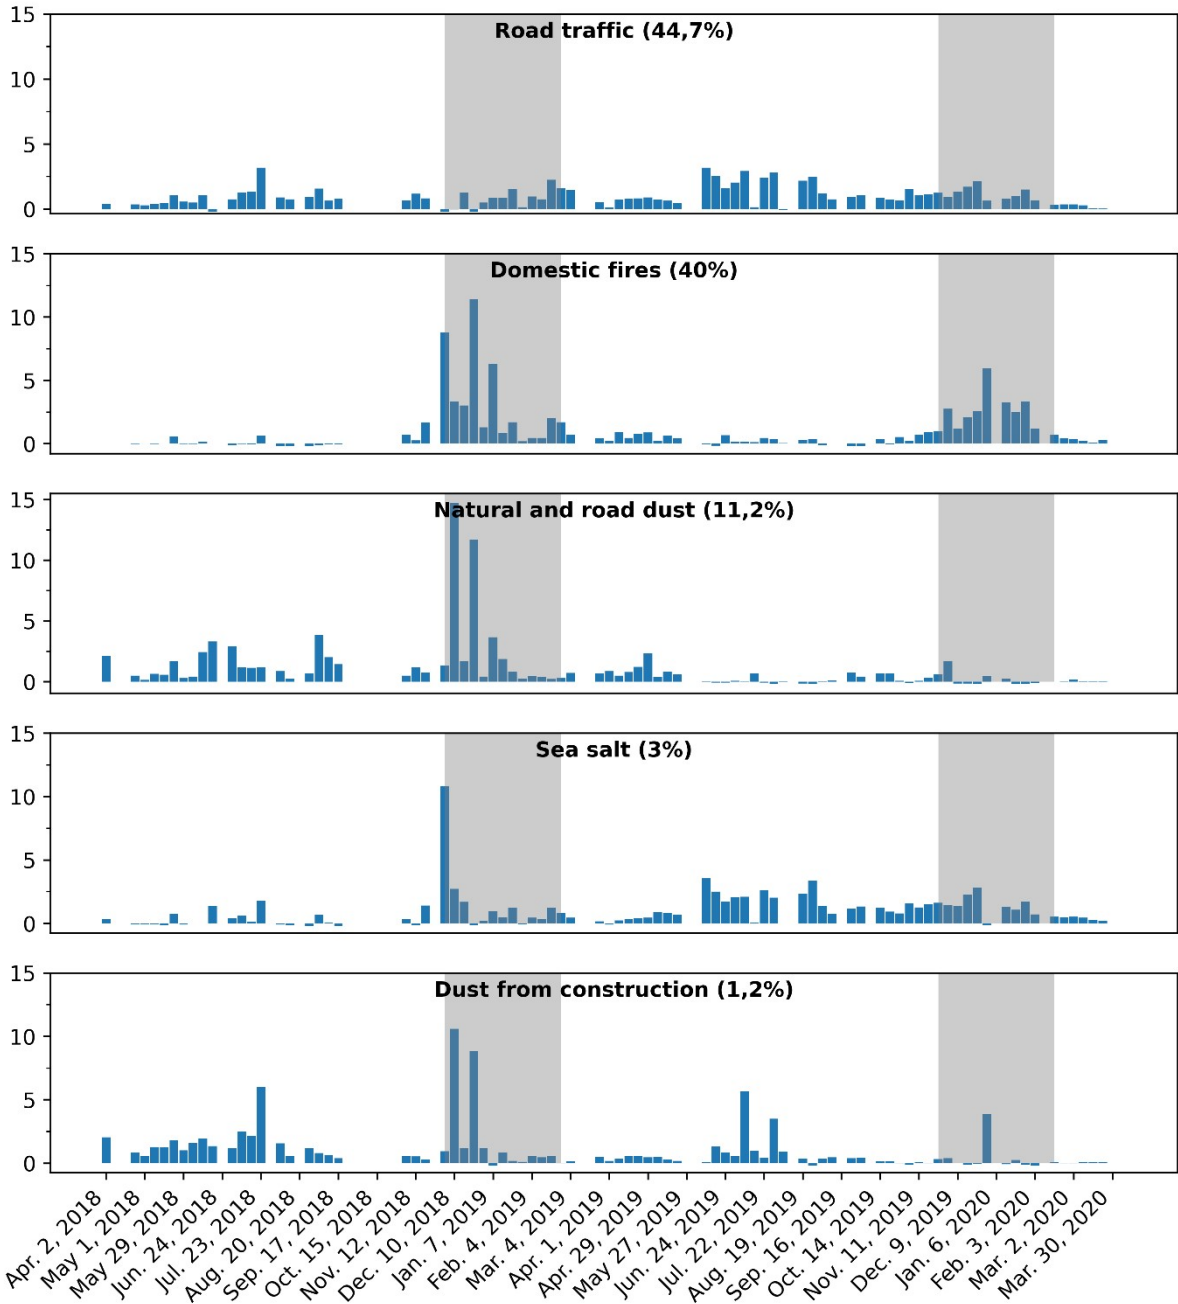

Fig. S4 Contribution profiles of identified sources to PM<sub>2.5</sub> aerosol concentrations in Korhogo (K1 site, UPGC). The gray-shaded areas represent the dry seasons (DS), from left to right, DS1 and DS2.

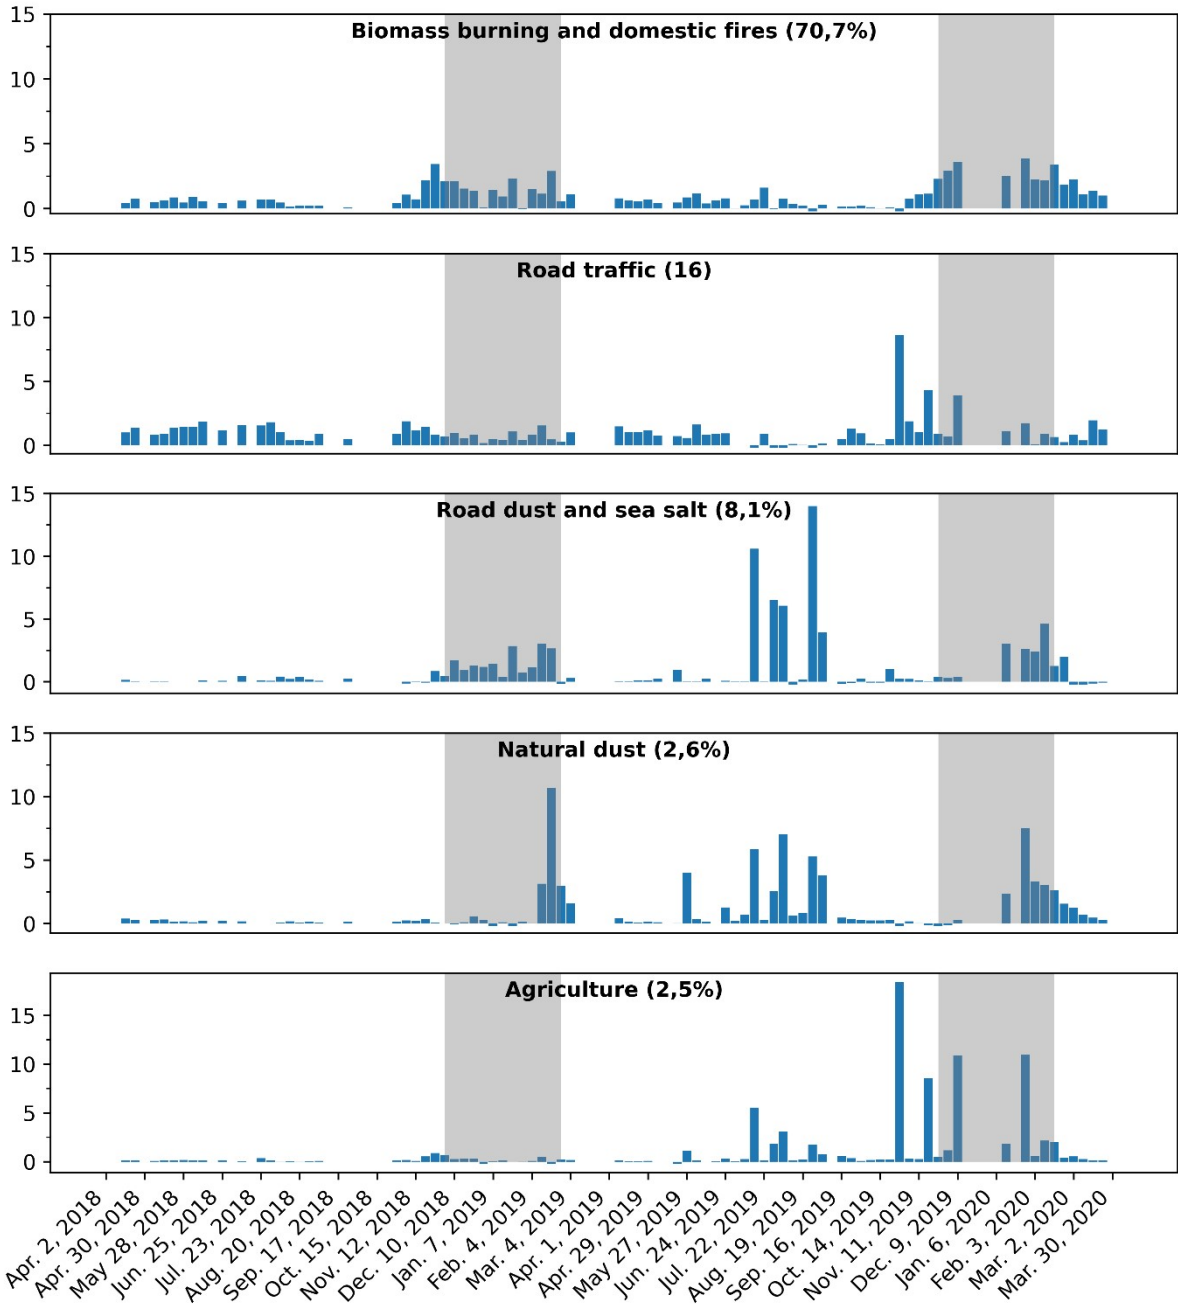

Fig. S5 Correlation matrices between the concentrations of chemical species analysed in PM2.5 collected in Abidjan (site A1, UFHB) and Korhogo (site K1, UPGC). To take account of unidentified fractions, the PM2.5 concentrations were added to the species.

| Korhogo (site K1, UPGC)                     |                   |       |      |                                  |                   |                                             |                 |                              |                               |                              |                 |                |                  |                  |                                             |
|---------------------------------------------|-------------------|-------|------|----------------------------------|-------------------|---------------------------------------------|-----------------|------------------------------|-------------------------------|------------------------------|-----------------|----------------|------------------|------------------|---------------------------------------------|
|                                             | PM <sub>2.5</sub> | EC    | OC   | CH <sub>3</sub> COO <sup>-</sup> | HCOO <sup>-</sup> | C <sub>2</sub> O <sub>4</sub> <sup>2-</sup> | Cl <sup>-</sup> | NO <sub>3</sub> <sup>-</sup> | SO <sub>4</sub> <sup>2-</sup> | NH <sub>4</sub> <sup>+</sup> | Na <sup>+</sup> | K <sup>+</sup> | Mg <sup>2+</sup> | Ca <sup>2+</sup> |                                             |
| PM <sub>2.5</sub>                           | 1.00              | 0.57  | 0.65 | 0.22                             | 0.16              | 0.03                                        | 0.07            | -0.09                        | 0.03                          | 0.01                         | -0.01           | 0.27           | 0.04             | 0.17             | PM <sub>2.5</sub>                           |
| EC                                          | 0.48              | 1.00  | 0.70 | 0.27                             | 0.25              | 0.12                                        | 0.01            | -0.13                        | 0.04                          | 0.09                         | -0.09           | 0.29           | 0.09             | 0.27             | EC                                          |
| OC                                          | 0.88              | 0.49  | 1.00 | 0.32                             | 0.25              | 0.12                                        | 0.10            | -0.10                        | 0.09                          | 0.06                         | 0.01            | 0.39           | 0.08             | 0.23             | OC                                          |
| CH <sub>3</sub> COO <sup>-</sup>            | 0.10              | -0.01 | 0.09 | 1.00                             | 0.62              | 0.45                                        | 0.38            | 0.37                         | 0.41                          | 0.54                         | 0.09            | 0.69           | 0.52             | 0.63             | CH <sub>3</sub> COO <sup>-</sup>            |
| HCOO <sup>-</sup>                           | 0.57              | 0.28  | 0.52 | 0.05                             | 1.00              | 0.44                                        | 0.24            | 0.52                         | 0.63                          | 0.50                         | 0.09            | 0.79           | 0.46             | 0.65             | HCOO <sup>-</sup>                           |
| C <sub>2</sub> O <sub>4</sub> <sup>2-</sup> | 0.34              | 0.41  | 0.39 | 0.12                             | 0.26              | 1.00                                        | 0.42            | 0.65                         | 0.44                          | 0.93                         | -0.10           | 0.54           | 0.95             | 0.84             | C <sub>2</sub> O <sub>4</sub> <sup>2-</sup> |
| Cl <sup>-</sup>                             | 0.39              | 0.35  | 0.41 | 0.18                             | 0.36              | 0.84                                        | 1.00            | 0.37                         | 0.28                          | 0.45                         | 0.80            | 0.47           | 0.51             | 0.42             | Cl <sup>-</sup>                             |
| NO <sub>3</sub> <sup>-</sup>                | 0.41              | 0.30  | 0.38 | -0.11                            | 0.47              | 0.26                                        | 0.42            | 1.00                         | 0.68                          | 0.69                         | 0.08            | 0.51           | 0.76             | 0.63             | NO <sub>3</sub> <sup>-</sup>                |
| SO <sub>4</sub> <sup>2-</sup>               | 0.55              | 0.46  | 0.56 | -0.06                            | 0.57              | 0.44                                        | 0.59            | 0.94                         | 1.00                          | 0.50                         | 0.08            | 0.65           | 0.56             | 0.59             | SO <sub>4</sub> <sup>2-</sup>               |
| NH <sub>4</sub> <sup>+</sup>                | 0.24              | 0.38  | 0.26 | 0.08                             | 0.39              | 0.68                                        | 0.79            | 0.74                         | 0.79                          | 1.00                         | -0.06           | 0.56           | 0.94             | 0.85             | NH <sub>4</sub> <sup>+</sup>                |
| Na <sup>+</sup>                             | 0.23              | 0.08  | 0.20 | -0.09                            | 0.17              | 0.12                                        | 0.42            | 0.74                         | 0.60                          | 0.45                         | 1.00            | 0.19           | -0.02            | -0.03            | Na <sup>+</sup>                             |
| K <sup>+</sup>                              | 0.71              | 0.52  | 0.72 | -0.03                            | 0.60              | 0.50                                        | 0.61            | 0.85                         | 0.95                          | 0.71                         | 0.56            | 1.00           | 0.58             | 0.66             | K <sup>+</sup>                              |
| Mg <sup>2+</sup>                            | 0.13              | 0.24  | 0.17 | 0.56                             | 0.23              | 0.58                                        | 0.72            | 0.33                         | 0.40                          | 0.76                         | 0.24            | 0.39           | 1.00             | 0.89             | Mg <sup>2+</sup>                            |
| Ca <sup>2+</sup>                            | 0.53              | 0.49  | 0.55 | 0.22                             | 0.44              | 0.89                                        | 0.84            | 0.48                         | 0.66                          | 0.79                         | 0.21            | 0.70           | 0.66             | 1.00             | Ca <sup>2+</sup>                            |
|                                             | PM <sub>2.5</sub> | EC    | OC   | CH <sub>3</sub> COO <sup>-</sup> | HCOO <sup>-</sup> | C <sub>2</sub> O <sub>4</sub> <sup>2-</sup> | Cl <sup>-</sup> | NO <sub>3</sub> <sup>-</sup> | SO <sub>4</sub> <sup>2-</sup> | NH <sub>4</sub> <sup>+</sup> | Na <sup>+</sup> | K <sup>+</sup> | Mg <sup>2+</sup> | Ca <sup>2+</sup> |                                             |
| Abidjan (site A1, UFHB)                     |                   |       |      |                                  |                   |                                             |                 |                              |                               |                              |                 |                |                  |                  |                                             |

Fig. S6 Monthly back-trajectories for Dec. 2018, Jan. and Feb. 2018 2019 (DS1) and Dec. 2019, Jan. and Feb. 2019 2020 (DS2), assessed on Abidjan at 50 m above ground.

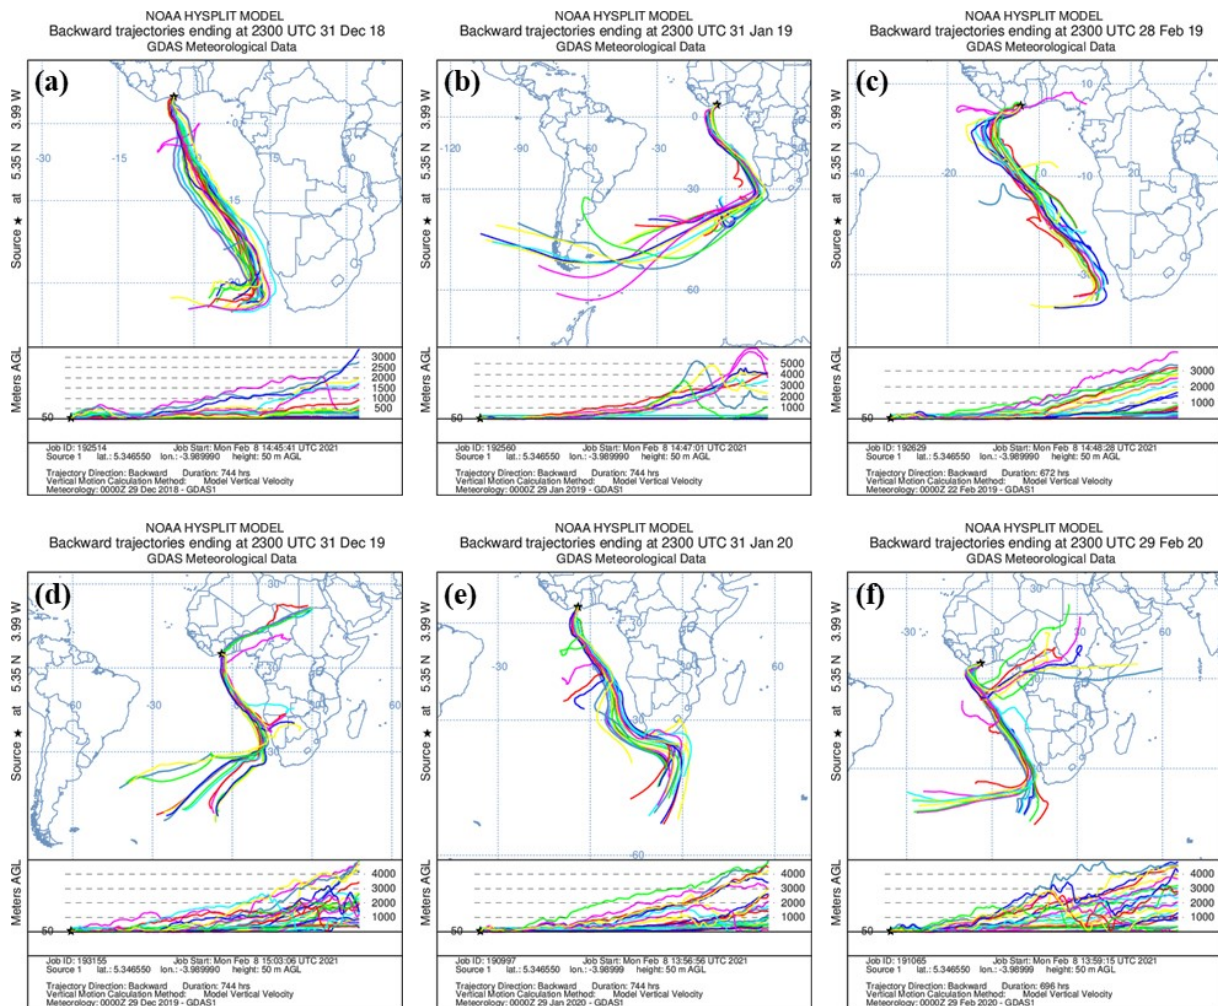

Fig. S7 Monthly back-trajectories for Dec. 2018, Jan. and Feb. 2018 2019 (DS1) and Dec. 2019, Jan. and Feb. 2019 2020 (DS2), assessed on Korhogo at 50 m above ground level

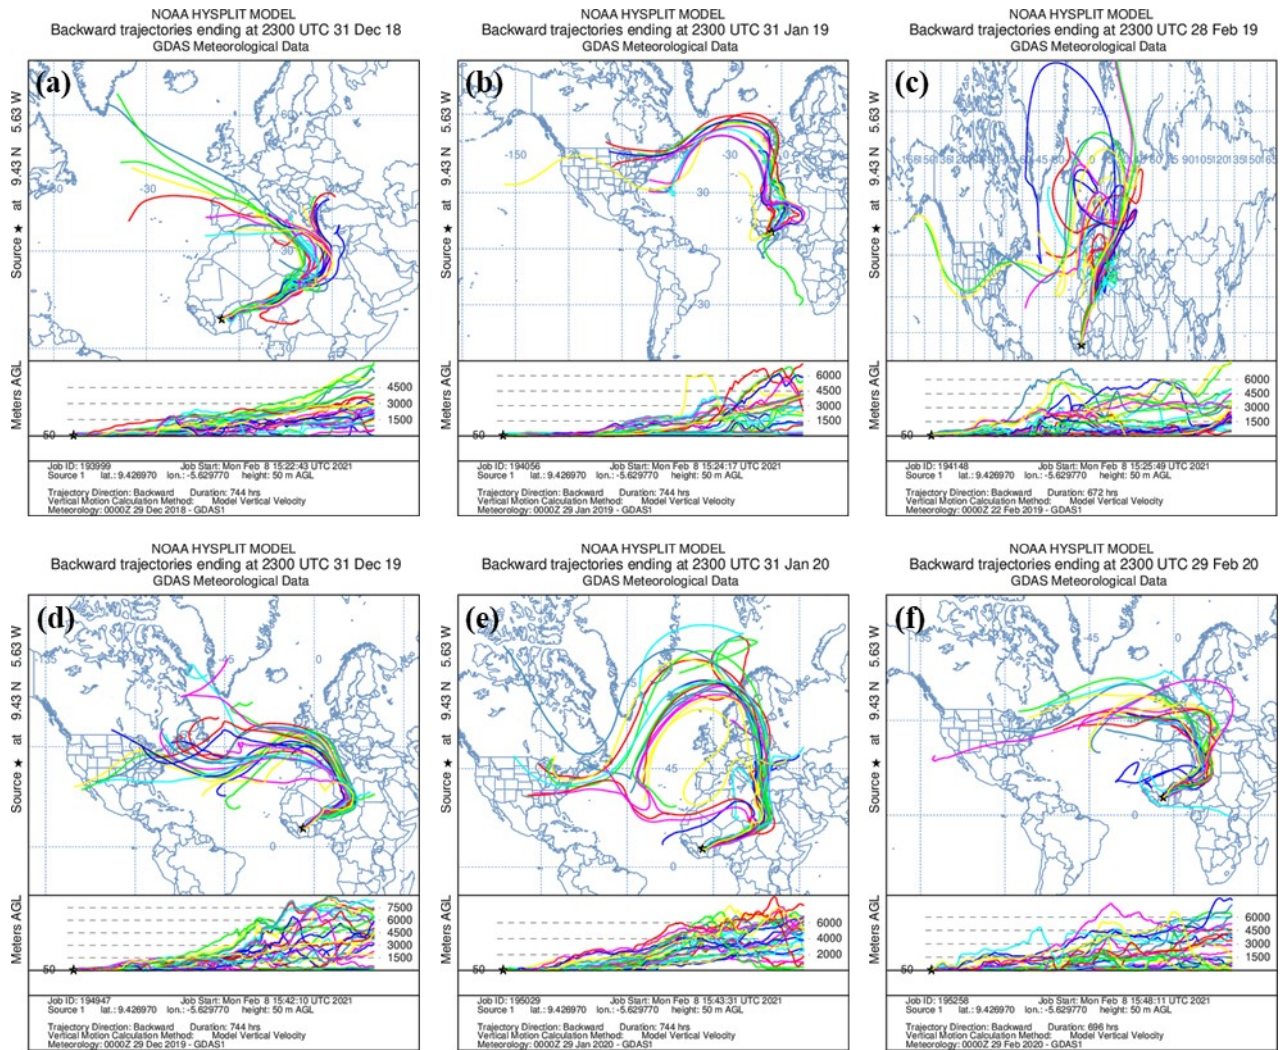



Fig. S8 Wind roses for Dec. 2018, Jan. and Feb. 2019 (DS1) and Dec. 2019, Jan. and Feb. 2020 (DS2), evaluated over Abidjan using data measured at synoptic stations

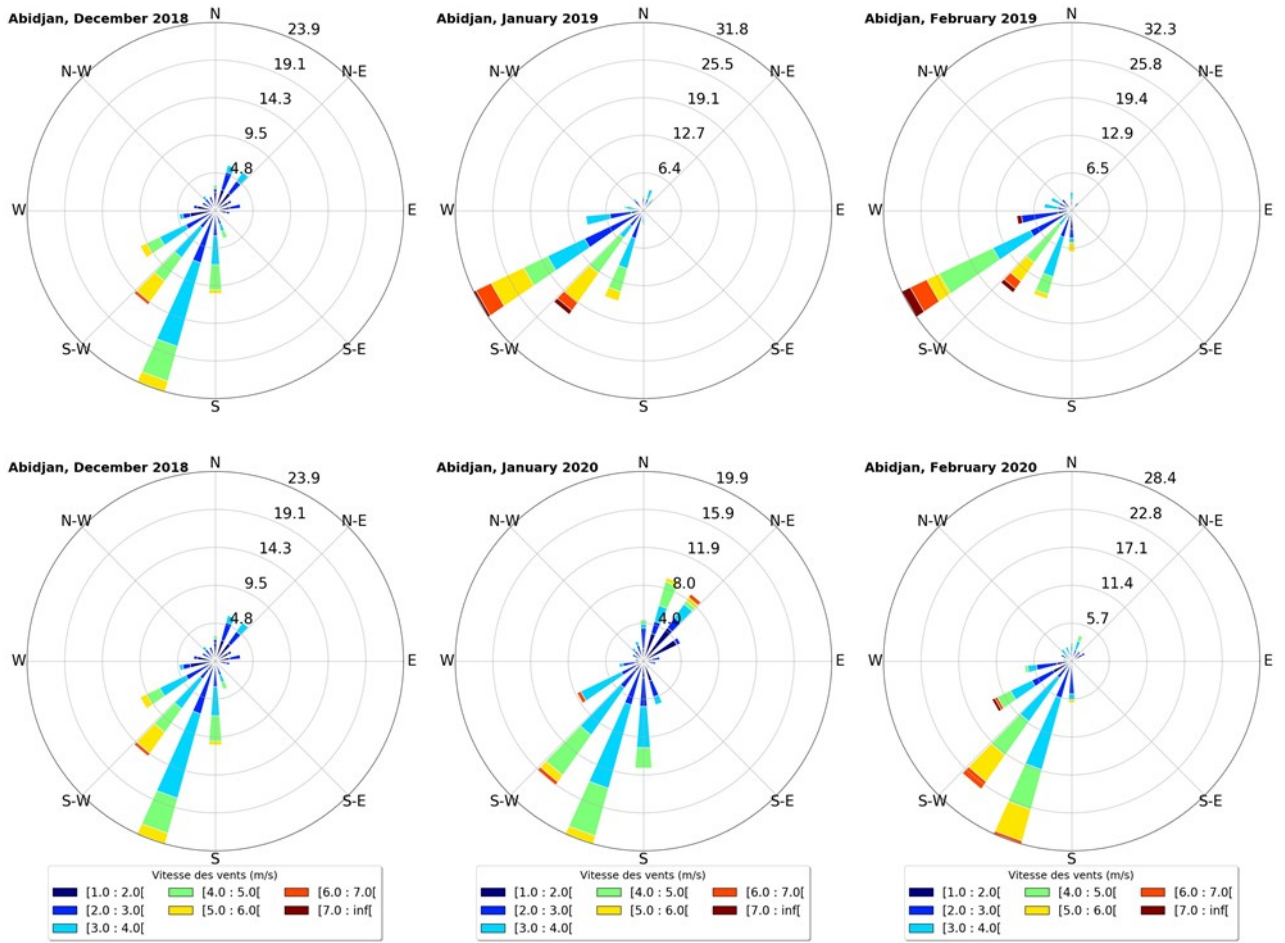

Fig. S9 Wind roses for Dec. 2018, Jan. and Feb. 2019 (DS1) and Dec. 2019, Jan. and Feb. 2020 (DS2), evaluated over Korhogo using data measured at synoptic stations

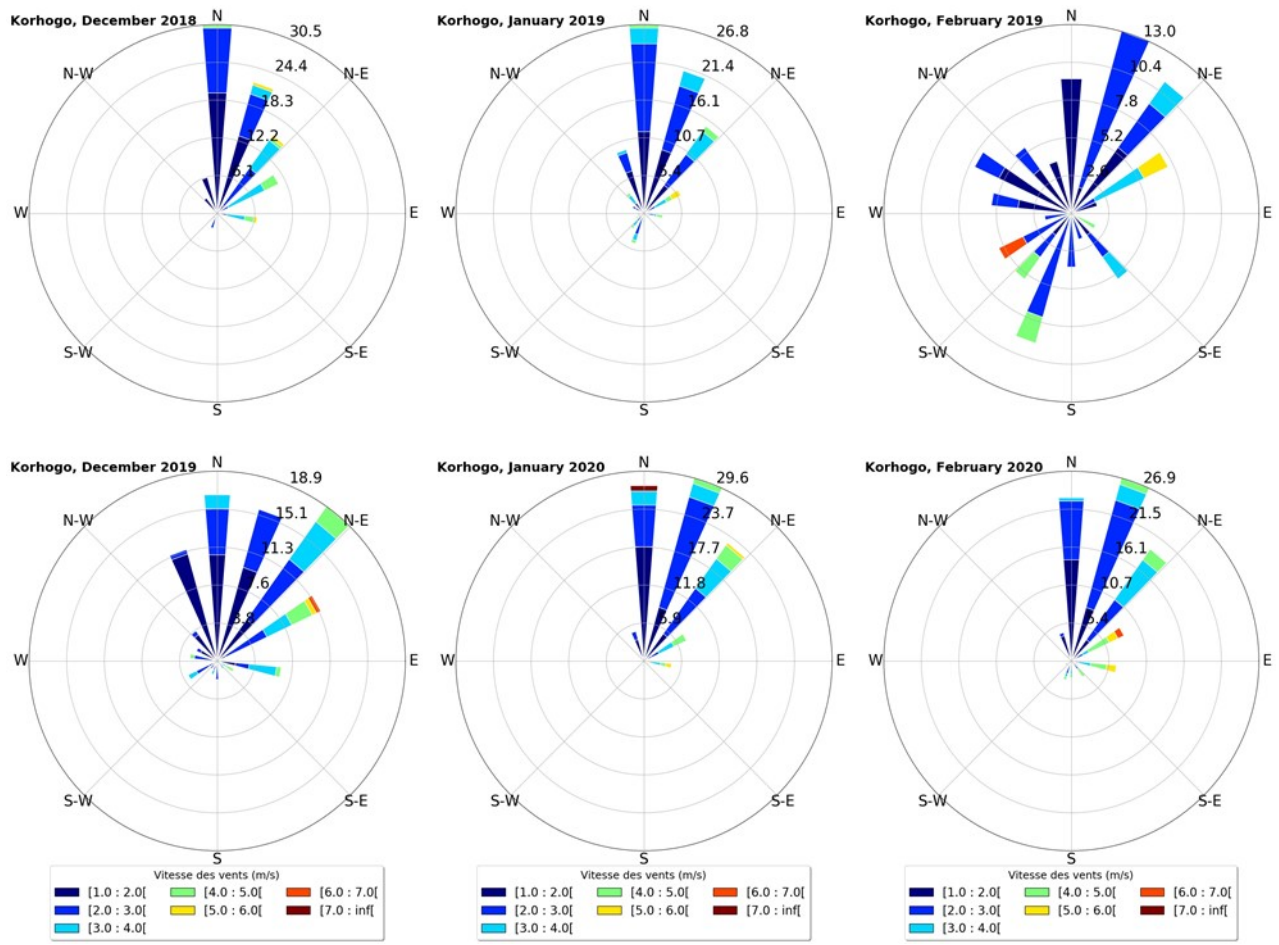

Supplement: d3ea00131h1.pdf [file d3ea00131h1.pdf]
